A suitably "springy" stethoscope placed about the base of the neck distends the EJV of most patients (figs. 1A and 1B). Repositioning of the stethoscope may be required to "pop up" the vein. The stethoscope is left on the patient's neck during cannulation and then removed to prevent back bleeding and to relieve venous obstruction. Patient acceptance is good, the equipment is readily available, and complications are absent. It is now a routine part of the preoperative exam in patients in whom the possibility of EJV cannulation is raised.

MARK S. SCHELLER, M.D.  
*Resident in Anesthesiology*

Anesthesiology  
57:547, 1982

LAWRENCE J. SAIDMAN, M.D.  
*Professor and Chairman  
Department of Anesthesiology  
University of California, San Diego  
San Diego, California 92103-9981*

#### REFERENCES

1. Blitt CD, Wright WA, Petty WC, Webster TA: Central venous catheterization via the external jugular vein. A technique employing the J-wire. JAMA 229:817, 1974

(Accepted for publication June 10, 1982.)

### Responsibility for Equipment Failure: Consumer vs. Manufacturer

*To the Editor:*—One should take exception with the spirit of the Anderson and Rendell-Baker letter,<sup>1</sup> which would appear to be "let us make George take of it!!"

After looking at the photograph which accompanied the letter, one notices that the two instruments on the shelf of the anesthesia gas machine are not anchored properly by means of bolts, screws, or "T" or "B" bars; one also notices that provisions have not been made for all cables, to and from the instruments, to be equipped with an appropriate strain release chain (this is a device tightly anchored to the cable at one end and to the supporting frame at the other end in such a manner that any pull on the cable is both transmitted and absorbed by the frame and does not dislodge the instrument).

Since it would appear that the photograph was taken after the accident, the inference would have to be that not much was learned from the accident.

I would submit that the real issue is not the damage

to the O<sub>2</sub> flush knob, which occurred this time, but rather, the fact that any piece of equipment sitting *unsecured* on a shelf is a general hazard (the next time a patient's head might be injured or a fire may be started).

Before blaming the manufacturer for any mishap, and thereby forcing new standards and regulations as well as costly modifications one should take a much closer and harsher look at the real culprit which is "us, the users."

ANTONIO BOBA, M.D.  
*85 Albany Post Road  
P.O. Box 631  
Hyde Park, New York 12538*

#### REFERENCE

1. Anderson CE, Rendell-Baker L: Exposed O<sub>2</sub> flush hazard. ANESTHESIOLOGY 56:328, 1982

(Accepted for publication June 10, 1982.)

Anesthesiology  
57:547-548, 1982

### Thiopental Anesthesia for Cesarean Section

*To the Editor:*—We were astounded to read the recent recommendation regarding intermittent thiopental injections as the sole anesthetic for cesarean section.<sup>1</sup> This method may have been acceptable in 1974, but it is no longer appropriate in 1982 when mother and father, obstetrician and neonatologist demand newborn conditions that facilitate parent-infant interaction.

Based on umbilical vein and artery blood thiopental concentrations, the authors concluded that, with their method, "thiopental levels in the fetus and newborn . . . are not excessive." However, umbilical cord blood values are indicative only of the condition at birth. A study of thiopental pharmacokinetics in cesarean section has revealed a neonatal elimination half-life from 11 to
